1

2

3

4

## Loss of IKK subunits limits NF- $\kappa$ B signaling in reovirus infected cells

5

6

Andrew J. McNamara<sup>1</sup> and Pranav Danthi<sup>1\*</sup>

7

8

9

10

<sup>1</sup>Department of Biology, Indiana University, Bloomington, Indiana 47405

11

12

13

14

15

\*, To whom correspondence should be addressed: Department of Biology, Indiana

16

University, Bloomington, IN 47405. Tel: 812-856-2449, Fax: 812-856-5710, E-mail:

17

[pdanthi@indiana.edu](mailto:pdanthi@indiana.edu)

## 18 **ABSTRACT**

19 Viruses commonly antagonize innate immune pathways that are primarily driven by  
20 Nuclear Factor- $\kappa$ B (NF- $\kappa$ B), Interferon Regulatory Factor (IRF) and Signal Transducer  
21 and Activator of Transcription (STAT) family of transcription factors. Such a strategy  
22 allows viruses to evade immune surveillance and maximize their replication. Using an  
23 unbiased RNA-seq based approach to measure gene expression induced by  
24 transfected viral genomic RNA (vgRNA) and reovirus infection, we discovered that  
25 mammalian reovirus inhibits host cell innate immune signaling. We found that while  
26 vgRNA and reovirus infection both induce a similar IRF dependent gene expression  
27 program, gene expression driven by the NF- $\kappa$ B family of transcription factors is lower in  
28 infected cells. Potent agonists of NF- $\kappa$ B, such as Tumor Necrosis Factor alpha (TNF $\alpha$ )  
29 and vgRNA, failed to induce NF- $\kappa$ B dependent gene expression in infected cells. We  
30 demonstrate that NF- $\kappa$ B signaling is blocked due to loss of critical members of the  
31 Inhibitor of KappaB Kinase (IKK) complex, NF- $\kappa$ B Essential MOdifier (NEMO) and IKK $\beta$ .  
32 The loss of the IKK complex components prevents nuclear translocation and  
33 phosphorylation of NF- $\kappa$ B, thereby preventing gene expression. Our studies  
34 demonstrate that reovirus infection selectively blocks NF- $\kappa$ B, likely to counteract its  
35 antiviral effects and promote efficient viral replication.

36

## 37 **IMPORTANCE**

38 Host cells mount a response to curb virus replication in infected cells and prevent  
39 infection of neighboring, as yet uninfected cells. The NF- $\kappa$ B family of proteins is

40 important for the cell to mediate this response. In this study, we show that in cells  
41 infected with mammalian reovirus, NF- $\kappa$ B is inactive. Further, we demonstrate that NF-  
42  $\kappa$ B is rendered inactive because virus infection results in reduced levels of upstream  
43 intermediaries (called IKKs) that are needed for NF- $\kappa$ B function. Based on previous  
44 evidence that active NF- $\kappa$ B limits reovirus infection, we conclude that inactivating NF- $\kappa$ B  
45 is a viral strategy to produce a cellular environment that is favorable for virus replication.

## 46 INTRODUCTION

47 The mammalian innate immune response is an effective response to viral intrusion. The  
48 primary mechanism of innate control of virus infection is the production of antiviral  
49 cytokines. Paracrine signaling by these cytokines establishes an antiviral state in  
50 neighboring, uninfected cells, making them refractory to virus infection and limiting  
51 dissemination of virus in the host (1). Expression of these cytokines is under the control  
52 of two major transcription factors, Nuclear Factor- $\kappa$ B (NF- $\kappa$ B) and Interferon Regulatory  
53 Factor 3 (IRF3) (2). NF- $\kappa$ B and IRF3 are activated downstream of a signal that is  
54 initiated by sensing of pathogen-associated molecules extracellularly, within transit  
55 through cellular uptake pathways, or within the cell (2). For RNA viruses, cell surface or  
56 endosomal sensing of the genomic material via Toll like Receptors (TLRs), or  
57 cytoplasmic sensing via the RIG-I like Receptors (RLRs) are two major mechanisms of  
58 pathogen recognition (2). Animal models and cell lines lacking any component of the  
59 signaling module – sensor, transcription factors, or cytokines – are typically more  
60 susceptible to viral infections than those with an intact immune response (3-6).

61 Because these initial stages of the innate immune response are so effective at  
62 limiting viral replication, most viruses have evolved one or more mechanisms to limit  
63 either the production or activity of these anti-viral cytokines (7, 8). Frequently, viruses  
64 antagonize the immune response by sequestering, degrading, or inactivating one or  
65 more cellular components that are required for a cytokine based antiviral response (7,  
66 8). Targeting transcription factor function is a commonly used viral strategy, perhaps  
67 because transcription factors serve a critical node that controls the expression of  
68 multiple antiviral molecules. Among these, NF- $\kappa$ B can control the function of a wide

69 variety of pro-inflammatory chemokines and cytokines (9). The NF- $\kappa$ B transcription  
70 factor family is composed of five different subunits that function as homo or  
71 heterodimers. The classical NF- $\kappa$ B complex (henceforth referred to as NF- $\kappa$ B),  
72 composed of p65 and p50 subunits, is a critical regulator of antiviral gene expression  
73 (9). In an inactive state, it is sequestered in the cytoplasm by the Inhibitor of  $\kappa$ B (I $\kappa$ B)  
74 inhibitor proteins (9). NF- $\kappa$ B transcriptional activity is regulated by the I $\kappa$ B Kinase (IKK)  
75 complex (9). The IKK complex, which is composed of IKK $\alpha$ , IKK $\beta$ , and NEMO,  
76 phosphorylates I $\kappa$ B, which leads to its ubiquitination and degradation. Freed from its  
77 inhibitor, NF- $\kappa$ B is able to translocate to the nucleus, bind to DNA, and initiate gene  
78 expression. The transactivation function of NF- $\kappa$ B also requires IKK-mediated  
79 phosphorylation of the p65 subunit (10).

80 Mammalian orthoreovirus (reovirus) is a dsRNA virus which replicates in the  
81 cytoplasm of the host cell (11). Like most other viruses, reovirus pathogenesis is  
82 influenced by NF- $\kappa$ B signaling (12). In a newborn mouse model, NF- $\kappa$ B plays an  
83 antiviral role in the heart. In comparison to wildtype mice, NF- $\kappa$ B p50  $-/-$  mice exhibit  
84 higher viral titers, tissue damage, and cell death, indicating that NF- $\kappa$ B is antiviral in this  
85 context. This outcome, at least in part, is due an inability of p50 $-/-$  mice to produce IFN $\beta$ .  
86 Despite the fact that the viral genomic RNA remains within the two concentric protein  
87 shells that comprise the reovirus capsid, the current model posits that the innate  
88 immune response is initiated when genomic RNA from incoming virions is sensed by  
89 the RLRs - RIG-I and MDA5 (9, 13). The sensing of the RNA leads to the activation of  
90 IRF3 and NF- $\kappa$ B, which lead to the production of IFN and other inflammatory cytokines

91 (14). Whether reovirus actively limits this antiviral response has not been extensively  
92 scrutinized.

93 In this study, we investigated whether reovirus inhibits innate immune signaling  
94 following infection. Using RNA-seq, we found that NF- $\kappa$ B activity was inhibited in  
95 infected cells following treatment with multiple agonists including viral genomic RNA  
96 (vgRNA) and Tumor Necrosis Factor alpha (TNF $\alpha$ ). We discovered that this inhibition  
97 was due to reduced cellular levels of the IKK components, IKK $\beta$  and NEMO. Loss of the  
98 IKK complex led to inhibition of NF- $\kappa$ B nuclear translocation and consequent blockade  
99 of its transactivation function. Blockade of viral gene expression prevented IKK loss,  
100 suggesting that events in viral replication after cell entry are required for IKK loss and  
101 NF- $\kappa$ B inhibition. This study highlights a previously unknown mechanism by which  
102 reovirus infection blunts the host innate immune response.

103

## 104 RESULTS

105 **NF- $\kappa$ B dependent gene expression is blocked in reovirus-infected cells.** The  
106 genomic dsRNA within reovirus particles serves as the pathogen associated molecular  
107 pattern that activates the innate immune response via RIG-I and MDA5 (15-17). To  
108 determine if reovirus infection modifies this response, we compared the host cell  
109 response in L929 cells following transfection of vgRNA with the response following  
110 infection with reovirus strain type 3 Abney (T3A). Using RNA-seq analyses, we found  
111 that viral RNA transfection induced the expression of 978 genes (Fig. 1A, 1B). For these  
112 analyses, we considered only those genes whose expression was increased > 4 fold  
113 ( $\log_2FC > 2$ ) and were identified with false discovery rate (FDR) of < 0.05 to be  
114 significantly different. We used iRegulon, which predicts transcriptional regulators for a  
115 similarly expressed gene set by providing a Normalized Enrichment Score (NES) (18). A  
116 high NES for a given transcription factor indicates that many of the genes in a set are  
117 likely regulated by that transcription factor. We used this program to identify which  
118 transcription factors most likely regulate the genes induced following treatment with  
119 vgRNA. We found that, of the 978 genes induced by vgRNA, the highest NES scores  
120 were assigned to NF- $\kappa$ B and IRF, with scores of 4.0 and 10.0 respectively (Fig. 1C).  
121 Predictably, reovirus infection induced a similar gene expression profile. 65% of the 978  
122 genes induced by vgRNA were also induced by reovirus. When we used iRegulon to  
123 predict the transcription factors which regulate the genes induced by reovirus infection,  
124 we found that, while genes regulated by IRF were enriched in this list (NES of 12.0),  
125 genes regulated by NF- $\kappa$ B were not. Surprisingly, the NES for NF- $\kappa$ B fell below the 3.0  
126 cutoff indicating that NF- $\kappa$ B target genes were not enriched in the set of genes induced

127 by reovirus infection (Fig. 1C). Of the 978 genes induced by vgRNA described above,  
128 35% of genes (339 of 978) were expressed to a lower extent in reovirus infected cells.  
129 Using iRegulon, we predicted that NF- $\kappa$ B target genes were enriched in this set, as the  
130 NES for NF- $\kappa$ B increased from 4.0 to 4.9 (Fig. 1C). These data suggest that NF- $\kappa$ B and  
131 IRF transcription factor families are regulated differently in cells transfected with RNA  
132 and cells infected with reovirus. Thus, the observed differences in the gene expression  
133 profiles of RNA transfected and reovirus infected cells are not related to differences in  
134 RNA sensing. Instead, this difference may be because reovirus fails to activate NF- $\kappa$ B  
135 signaling pathway or because it has evolved a mechanism to block NF- $\kappa$ B signaling.

136 To distinguish between these possibilities, we determined whether reovirus  
137 infection inhibits vgRNA-induced NF- $\kappa$ B activation. Toward this end, we compared if  
138 gene expression in uninfected cells transfected with vgRNA differed from infected cells  
139 transfected with vgRNA. As described above, vgRNA transfection of uninfected cells  
140 induces expression of 978 genes (Fig. 1A). In infected cells, however, vgRNA failed to  
141 induce 13% of these genes (133 of 978) (Fig. 1D, 1E). We used iRegulon to predict that  
142 the most likely transcriptional regulator of genes whose expression was inhibited by  
143 reovirus infection was NF- $\kappa$ B, with an NES of 6.1. These data allow us to conclude that  
144 reovirus blocks NF- $\kappa$ B dependent gene expression even in the presence of a potent  
145 agonist.

146 vgRNA and reovirus infection activate NF- $\kappa$ B downstream via a common set of  
147 sensors that detect RNA (15-17, 19). To determine if the inhibitory effect of reovirus on  
148 NF- $\kappa$ B dependent gene expression is only restricted to viral RNA-induced gene  
149 expression, we used TNF $\alpha$ , a potent stimulator of NF- $\kappa$ B signaling. RNA-seq analyses



150 of uninfected cells treated with TNF $\alpha$ , using the same criteria described above, led to  
151 the upregulation of 32 transcripts (Fig. 2A). In contrast, TNF $\alpha$  has no significant effect  
152 on gene expression in cells infected with T3A (Fig. 2B, 2C, 2D). These data indicate  
153 that infection of cells with T3A results in blockade of NF- $\kappa$ B-dependent transcription.  
154 vgRNA and TNF $\alpha$  initiate NF- $\kappa$ B signaling via distinct routes. Therefore, our analyses  
155 suggest that reovirus blocks NF- $\kappa$ B signaling at a step that is shared by both signaling  
156 pathways.

157 **I $\kappa$ B Kinase (IKK) activity is diminished in reovirus-infected cells.** To verify  
158 our RNA-seq analyses, we measured the capacity of vgRNA and TNF $\alpha$  to induce the  
159 expression of an NF- $\kappa$ B target gene in reovirus infected cells using RT-qPCR. For these  
160 experiments we monitored the transcript levels of I $\kappa$ B $\alpha$ , an NF- $\kappa$ B target gene. Because  
161 the I $\kappa$ B $\alpha$  protein inhibits NF- $\kappa$ B nuclear translocation, its expression serves as a  
162 feedback inhibitor of NF- $\kappa$ B activity (20). Consistent with our RNA-seq data, we found  
163 that reovirus inhibits I $\kappa$ B $\alpha$  expression to a significant extent following treatment with  
164 either agonist (Fig. 3A, 3B). Because the effect of reovirus on both NF- $\kappa$ B agonists was  
165 equivalent, we used TNF $\alpha$  for the remainder of our experiments. TNF $\alpha$  treatment of  
166 cells should promote nuclear translocation of p65. We measured nuclear p65 levels in  
167 mock-infected and reovirus-infected cells treated with TNF $\alpha$ . As expected, TNF $\alpha$   
168 treatment of mock infected cells resulted in an accumulation of p65 in the nucleus within  
169 1 h (Fig. 3C). Prior infection with T3A prevented TNF $\alpha$  driven accumulation of p65 in the  
170 nucleus. These data agree with previous evidence indicating that degradation of the  
171 I $\kappa$ B $\alpha$  protein is blocked in reovirus infected cells (21). I $\kappa$ B $\alpha$  degradation is initiated by the  
172 phosphorylation of I $\kappa$ B $\alpha$  by the I $\kappa$ B Kinase (IKK) complex, which leads to

173 polyubiquitination and subsequent degradation of I $\kappa$ B $\alpha$  by the proteasome (9). Thus, the  
174 reduction in nuclear p65 levels in T3A infected cells treated with TNF $\alpha$  may be due to an  
175 absence of sufficient levels of active IKK. In addition to I $\kappa$ B $\alpha$ , the IKK complex also  
176 phosphorylates p65 at Ser536 prior to nuclear translocation (10). IKK-mediated p65  
177 Ser536 phosphorylation is critical for NF- $\kappa$ B dependent gene expression and is  
178 considered to be a marker for IKK activity (10). To determine if IKK activity is  
179 compromised in T3A-infected cells, we assessed the capacity of TNF $\alpha$  to promote p65  
180 phosphorylation at Ser536. While TNF $\alpha$  potently induced p65 phosphorylation in mock  
181 infected cells, both basal and TNF $\alpha$  induced p65 phosphorylation was dramatically  
182 reduced in T3A-infected cells (Fig. 3D). Thus, in reovirus infected cells, p65 nuclear  
183 translocation and phosphorylation, both of which require the IKK complex, are inhibited.  
184 These data suggest that reovirus may inhibit NF- $\kappa$ B dependent gene expression due to  
185 the inactivity of the IKK complex.

186 **Levels of IKK $\beta$  and NEMO are diminished following reovirus infection.** To  
187 determine the basis of IKK inactivity following infection with T3A, we examined the  
188 levels of IKK $\beta$  and NEMO, key IKK components that are required for NF- $\kappa$ B activation  
189 following TNF $\alpha$  treatment. We found that levels of IKK $\beta$  and NEMO are dramatically  
190 lower at 12 and 24 h following infection with T3A (Fig. 4A, 4B). In contrast, levels of an  
191 upstream signaling protein, RIP1, was unaffected by T3A infection. Similarly, levels of  
192 NF- $\kappa$ B constituents p50 and p65 also remained constant. These data indicate that T3A-  
193 mediated diminishment in levels of IKK $\beta$  and NEMO likely contributes to a reduction in  
194 IKK activity and resultant blockade of NF- $\kappa$ B in infected cells. Because IKK $\beta$  is the  
195 catalytic component of the IKK complex that is required for I $\kappa$ B $\alpha$  and p65 Ser536

196 phosphorylation, we used IKK $\beta$  levels as a surrogate to monitor the mechanism by  
197 which IKK activity is diminished following infection.

198 **Reovirus gene expression is required for the loss of IKK $\beta$ .** To determine the stage  
199 of the reovirus replication cycle that is required for the loss of the IKK complex and the  
200 inhibition of NF- $\kappa$ B, we treated cells with ribavirin, which diminishes viral gene  
201 expression (13, 22). We found that ribavirin treatment prevented T3A mediated loss of  
202 IKK $\beta$  (Fig. 5A). Consistent with this, in cells treated with ribavirin, T3A was no longer  
203 able to prevent TNF $\alpha$ -driven nuclear accumulation of p65 (Fig. 5B). Further, ribavirin  
204 treatment also reduced the capacity of T3A to block NF- $\kappa$ B dependent gene expression  
205 (Fig. 5C). Together these experiments indicate that one or more viral proteins produced  
206 following virus infection or a specific event in viral replication triggers the loss of IKK $\beta$ .

207 **IKK overexpression restores NF- $\kappa$ B signaling in reovirus infected cells.** To define  
208 whether blockade of NF- $\kappa$ B by T3A also occurred in other cell lines, we measured the  
209 capacity of T3A to influence TNF $\alpha$  induced expression of I $\kappa$ B $\alpha$  in HEK293 cells using  
210 RT-qPCR. Analogous to our observation in L929 cells, TNF $\alpha$  failed to induce I $\kappa$ B $\alpha$  gene  
211 expression in T3A infected HEK293 cells (Fig. 6A). Phosphorylation of p65 at Ser536  
212 (Fig. 6B) and its nuclear translocation following TNF $\alpha$  treatment were also inhibited (Fig.  
213 6C). Additionally, we noted a decrease in IKK $\beta$  levels in comparison to mock infected  
214 cells (Fig. 6B). To determine if ectopic overexpression of the IKK complex restores NF-  
215  $\kappa$ B signaling in reovirus infected cells, we transfected cells with constructs expressing  
216 tagged forms of IKK $\beta$  and NEMO. Overexpression of these constructs was sufficient to  
217 induce NF- $\kappa$ B signaling in mock infected cells, as marked by p65 Ser536  
218 phosphorylation (Fig. 6D). We found that upon infection of cells with T3A, no decrease

219 in IKK $\beta$  levels was observed. Correspondingly, IKK overexpression-induced p65  
220 phosphorylation remained unaffected by reovirus infection. These data further indicate a  
221 link between IKK $\beta$  levels and NF- $\kappa$ B activity in reovirus infected cells. Thus, we  
222 conclude that diminishment in IKK $\beta$  and NEMO levels is a key mechanism of reovirus-  
223 induced blockade of NF- $\kappa$ B signaling.

## 224 **DISCUSSION**

225 In this study, we sought to evaluate if reovirus infection alters the cellular response to  
226 pathogen invasion. Using RNA-seq, which allowed us to examine changes in the global  
227 transcriptional landscape, we found that target genes of IRF were induced to a similar  
228 extent in cells infected with reovirus and cells transfected with vgRNA. NF- $\kappa$ B target  
229 genes, however, were expressed to a much lower extent in infected cells in comparison  
230 to cells transfected with vgRNA. Moreover, exogenous NF- $\kappa$ B agonists failed to induce  
231 a NF- $\kappa$ B dependent gene expression program in infected cells. These data indicate that  
232 NF- $\kappa$ B activity is blocked in infected cells. We found that this blockade of NF- $\kappa$ B  
233 dependent gene expression is caused by a loss of IKK $\beta$  and NEMO, two critical  
234 components of the IKK complex. We propose that reovirus inhibits NF- $\kappa$ B to counter its  
235 antiviral effects and produce a cellular environment that is conducive for replication.

236 We show here that reovirus infection inhibits NF- $\kappa$ B signaling (Fig. 1, 2, 3). In  
237 contrast, previous studies demonstrate that reovirus infection leads to the activation of  
238 NF- $\kappa$ B (23). While canonical NF- $\kappa$ B signaling requires IKK $\beta$  and NEMO, reovirus  
239 induced NF- $\kappa$ B activation requires an unusual combination of IKK $\alpha$  and NEMO (24).  
240 Reovirus-induced activation of NF- $\kappa$ B occurs early following infection. Recent studies  
241 demonstrating a requirement for mitochondrial antiviral-signaling protein (MAVS) for NF-  
242  $\kappa$ B activation indicate that vgRNA initiates this response (17). While other work  
243 suggests roles for reovirus  $\mu$ 1 and  $\mu$ 2 proteins in activating NF- $\kappa$ B, it is unclear if this  
244 effect is through controlling the exposure of vgRNA or via another mechanism (25-27).  
245 Regardless, NF- $\kappa$ B activation early in infection does not require viral gene expression.  
246 In contrast, our studies presented here indicate that viral gene expression is required for

247 blockade of NF- $\kappa$ B (Fig. 5). Thus, detection of viral RNA activates NF- $\kappa$ B early in  
248 infection and expression of one or more viral gene products following establishment of  
249 infection results in blockade NF- $\kappa$ B, limiting further signaling through this pathway.  
250 Biphasic regulation of NF- $\kappa$ B was also previously suggested (21, 28). Our work  
251 presented here provides an explanation for this phenomenon. Serotype-specific  
252 capacity of reovirus to inhibit NF- $\kappa$ B is genetically linked to the genome segment  
253 encoding the reovirus attachment protein  $\sigma$ 1 (28). Because  $\sigma$ 1 properties impact the  
254 efficiency of infection and the level of viral gene expression (29), we think that the  
255 genetic link between  $\sigma$ 1 and NF- $\kappa$ B is indirect and the viral factor responsible for  
256 diminishment of IKK levels and blockade of NF- $\kappa$ B signaling remains unknown.

257         NF- $\kappa$ B is an effective pro-inflammatory signaling pathway that curbs infection.  
258 Pathogens therefore have evolved mechanisms to limit its activity. Infection with human  
259 coronavirus causes a loss of both IKK $\beta$  and NEMO through an unknown mechanism  
260 (30). The MCMV protein M45 targets NEMO for autophagolysosomal degradation (31).  
261 Shigella, an intracellular pathogenic bacteria secretes an effector with E3 ligase activity  
262 which targets NEMO for proteasomal degradation (32). In addition to degradation,  
263 pathogens also sequester the IKK complex (IAV NS1 protein) or prevent its activation  
264 (HCMV, enterovirus)(33-35). Here we show that reovirus infection leads to the loss of  
265 both IKK $\beta$  and NEMO (Fig. 4). This loss was not due to differences in the steady state  
266 levels of IKK $\beta$  mRNA in reovirus infected cells (not shown). It was also independent of  
267 the effect of reovirus infection on host translation suggesting that IKK $\beta$  levels were  
268 controlled post translationally (not shown). Reovirus does not encode a protease, ruling  
269 out a direct effect of a viral protease on IKK $\beta$ . Preventing acid-dependent protease

270 activity also did not restore IKK $\beta$  levels, indicating that lysosomal or autophagic  
271 degradation does not contribute to IKK loss (not shown). Thus, our work is in contrast to  
272 a previous study which suggested that TRIM29 in alveolar macrophages turns over  
273 NEMO via lysosomal degradation (36). Blockade of proteasome activity diminished  
274 reovirus infection, precluding us from evaluating the role of the proteasome in IKK $\beta$  loss  
275 following infection (not shown). Thus reovirus infection leads to IKK loss through a post-  
276 translational mechanism, likely degradation via a non-lysosomal pathway.

277         What is the physiologic relevance of blockade of the NF- $\kappa$ B signaling pathway by  
278 reovirus? A likely reason is because NF- $\kappa$ B can limit virus replication. Which NF- $\kappa$ B  
279 target(s) control virus infection has not been identified. An obvious NF- $\kappa$ B target that  
280 could inhibit reovirus infection is IFN. However, consistent with previous work  
281 suggesting that certain mouse cell types do not require NF- $\kappa$ B for IFN production (37,  
282 38), we found in our RNA-seq analyses that inhibition of NF- $\kappa$ B did not affect IFN  
283 production (Fig. 1). Thus the antiviral effect of NF- $\kappa$ B is independent from IFN. In  
284 contrast with IFN, we found that the expression of several other chemokines and  
285 cytokines was inhibited in reovirus infected cells. We hypothesize that one or more of  
286 these factors negatively regulates reovirus replication.

287         Two previous studies have suggested that reovirus limits the innate immune  
288 response. Reovirus can inhibit IFN production by sequestering IRF3 into viral factories  
289 (39). Additionally, reovirus can inhibit IFN signaling by nuclear sequestration of IRF9,  
290 which functions with STAT1 and 2 to promote expression of IFN stimulated genes (40).  
291 While our work did not directly test these ideas, our gene expression analyses indicate  
292 that reovirus does not inhibit the function of IRF3 (Fig. 1). We also do not observe

293 inhibition of the transcriptional complex that contains IRF9 (not shown). Because these  
294 previous studies were performed in different cell types and used different reovirus  
295 strains, we propose that reovirus has evolved multiple mechanisms to dampen the  
296 innate immune response. Our study presented here unveils one such mechanism.



## 297 **MATERIALS AND METHODS**

298 **Cells and viruses.** Murine L929 cells (ATCC CCL-1) were maintained in Eagle's  
299 minimal essential medium (MEM) (Lonza) supplemented with 10% fetal bovine serum  
300 (FBS) and 2 mM L-glutamine. Spinner-adapted L929 cells (obtained from T. Dermody's  
301 laboratory) were maintained in Joklik's MEM (Lonza) supplemented to contain 5% FBS,  
302 2 mM L-glutamine, 100 U/ml of penicillin, 100 µg/ml of streptomycin, and 25 ng/ml of  
303 amphotericin B. HEK293 cells (obtained from M. Marketon's laboratory) were  
304 maintained in Dulbecco's modified essential medium (DMEM) (Lonza) supplemented  
305 with 10% fetal bovine serum (FBS) and 2 mM L-glutamine. Spinner-adapted L929 cells  
306 were used for cultivating and purifying viruses and for plaque assays. ATCC L929 cells  
307 and HEK293 cells were used for all experiments to assess cell signaling. No differences  
308 were observed in permissivity between ATCC L929 cells and spinner-adapted L929  
309 cells. A laboratory stock of T3A (obtained from T. Dermody's laboratory) was used for  
310 infections. Infectious viral particles were purified by Vertrel XF extraction and CsCl  
311 gradient centrifugation (41). Viral titer was determined by a plaque assay using spinner-  
312 adapted L929 cell with chymotrypsin in the agar overlay.

313 **Antibodies and reagents.** Polyclonal antisera raised against T3D, T1L that have been  
314 described (42) were used to detect viral proteins in T3A infected cells. Rabbit antisera  
315 specific for IKK $\beta$  and p65 Ser536 phosphorylation specific antibody were purchased  
316 from Cell Signaling (catalog # 8943, 3033), rabbit antisera specific for p65 and NEMO  
317 were purchased from Santa Cruz Biotechnology (catalog # sc-372, sc-8330). Mouse  
318 antisera specific for PSTAIR and FLAG was purchased from Sigma-Aldrich (catalog#  
319 P7962, F-3165), mouse antisera specific for RIP1 was purchased from BD Biosciences

320 (catalog# 610458) Alexa Fluor-conjugated anti-mouse IgG and anti-rabbit IgG  
321 secondary antibodies were purchased from LI-COR. TNF $\alpha$  was purchased from Sigma  
322 and used at a concentration of 10 ng/ml. PSI proteasome inhibitor was purchased from  
323 Millipore and used at a concentration of 20  $\mu$ M (catalog# 53-916). Ribavirin was  
324 purchased from Sigma-Aldrich and used at a concentration of 200  $\mu$ M (catalog# R9644)

325 **Infections.** Confluent monolayers of ATCC L929 or HEK293 cells were adsorbed with  
326 either PBS or reovirus at the indicated MOI at room temperature for 1 h, followed by  
327 incubation with medium at 37°C for the indicated time interval. All inhibitors were added  
328 to cells in medium after the 1 h adsorption period.

329 **Analysis of host gene expression by RNA-seq.** Total RNA extracted using Aurum  
330 Total RNA Mini Kit (Bio-Rad) was submitted to Indiana University's Center for Genomics  
331 and Bioinformatics for cDNA library construction using a TruSeq Stranded mRNA LT  
332 Sample Prep Kit (Illumina) following the manufacturer's protocol. Sequencing was  
333 performed using an Illumina NextSeq500 platform with 75 bp sequencing module  
334 generating 38bp paired-end reads. After the sequencing run, demultiplexing with  
335 performed with bcl2fastq v2.20.0.422. Sequenced reads were adapter trimmed and  
336 quality filtered using Trimmomatic ver. 0.33 (43) with the cutoff threshold for average  
337 base quality score set at 20 over a sliding window of 3 bases. Reads shorter than 20  
338 bases post-trimming were excluded (LEADING:20 TRAILING:20  
339 SLIDINGWINDOW:3:20 MINLEN:20). Cleaned reads mapped to GRCm38.p6 mouse  
340 genome reference using STAR version STAR\_2.5.2b (44). Read pairs aligning to each  
341 gene from gencode vM17 annotation were counted with strand specificity using

342 featureCounts tool from subread package (45). The differential expression analysis was  
343 performed using DESeq2 version 1.12.3 (46).

344 iRegulon, a plugin to cytoscape version 3.7.1 was used to predict transcription  
345 factor activity based on a differentially expressed gene set (18). A maximum FDR value  
346 of motif similarity was set to 0.001. We used a NES value of 3.0 as the minimum cutoff  
347 for transcription factor enrichment.  $\Delta$  NES was calculated as follows: (NES for  
348 vgRNA>Mock) – (NES for experimental condition).

349 **RT-qPCR.** RNA was extracted from infected cells, at various times after infection, using  
350 Aurum Total RNA Mini Kit (Bio-Rad). For RT-qPCR, 0.5 to 2  $\mu$ g of RNA was reverse  
351 transcribed with the high-capacity cDNA RT kit (Applied Biosystems), using random  
352 hexamers. cDNA was subjected to PCR using SYBR Select Master Mix using gene  
353 specific primers (Applied Biosystems). Fold increases in gene expression with respect  
354 to control samples (indicated in each figure legend) were measured using the  
355  $\Delta\Delta C_T$  method (47). Calculations for determining  $\Delta\Delta C_T$  values and relative levels of gene  
356 expression were performed as follows: fold increase in cellular gene expression (with  
357 respect to glyceraldehyde-3-phosphate dehydrogenase [GAPDH] levels) =  $2^{-[(\Delta C_T)_{\text{TNF}\alpha} - (\Delta C_T)_{\text{GAPDH}}]}$   
358  $\Delta\Delta C_T = (\Delta C_T)_{\text{TNF}\alpha} - (\Delta C_T)_{\text{GAPDH}}$

359 **Preparation of cellular extracts.** For preparation of whole-cell lysates, cells were  
360 washed in phosphate-buffered saline (PBS) and lysed with 1 $\times$  RIPA (50 mM Tris  
361 [pH 7.5], 50 mM NaCl, 1% TX-100, 1% deoxycholate, 0.1% SDS, and 1 mM EDTA)  
362 containing a protease inhibitor cocktail (Roche), 500  $\mu$ M dithiothreitol (DTT), and  
363 500  $\mu$ M phenylmethylsulfonyl fluoride (PMSF), followed by centrifugation at 15,000  $\times$  g  
364 at 4°C for 15 min to remove debris. Nuclear extracts were prepared by lysing cells in a

365 hypotonic lysis buffer (10 mM HEPES, 10 mM KCl, 1.5 mM MgCl<sub>2</sub>, 0.5 mM DTT, and 0.5  
366 mM PMSF for 15 min, subsequent addition of 0.5% NP-40, and 10 seconds of  
367 vortexing. After centrifugation at 10,000 x g at 4°C for 10 min, nuclear pellet was  
368 washed with hypotonic lysis buffer and then resuspended in high-salt nuclear extraction  
369 buffer (25% glycerol, 20mM HEPES, 0.42 M NaCl, 10 mM KCl, 1.5 mM MgCl<sub>2</sub>, 0.5 mM  
370 DTT, 0.5 mM PMSF) at 4°C for 1 h. Nuclear extracts were obtained following removal of  
371 the insoluble fraction by centrifugation at 12,000 x g at 4°C for 10 min.

372 **Plasmid transfections.** Nearly confluent monolayers of HEK293 cells in 12 well plates  
373 were transfected with either 0.5 µg of empty vector or 0.25 µg each of FLAG-IKKβ or  
374 FLAG-NEMO expression vector using 1.5 µl Lipofectamine 2000 according to the  
375 manufacturer's instructions. Transfected cells were incubated at 37°C for 24 h prior to  
376 infection to allow expression from the plasmids.

377 **Immunoblot Assay.** Protein concentrations were estimated using a DC Protein Assay  
378 from Bio-Rad. Equal protein was loaded, and the cell lysates or extracts were resolved  
379 by electrophoresis in 10% polyacrylamide gels and transferred to nitrocellulose  
380 membranes. Membranes were blocked for at least 1 h in blocking buffer (StartingBlock  
381 T20 TBS Blocking Buffer) and incubated with antisera against p65 (1:1,000), p65 p-  
382 Ser536 (1:1,000), p50 (1:500), NEMO (1:500), IKKβ (1:1,000), RIP1 (1:1,000), reovirus  
383 (1:5,000), FLAG (1:1,000), and PSTAIR (1:5,000) at 4°C overnight. Membranes were  
384 washed three times for 5 min each with washing buffer (Tris-buffered saline [TBS]  
385 containing 0.1% Tween-20) and incubated with a 1:20,000 dilution of Alexa Fluor-  
386 conjugated goat anti-rabbit Ig (for p65, p50, IKKβ, NEMO and reovirus) or goat anti-

387 mouse Ig (for PSTAIR, RIP1, and FLAG) in blocking buffer. Following three washes,  
388 membranes were scanned and quantified using an Odyssey infrared Imager (LI-COR).

## 389 **FIGURE LEGENDS**

390 Fig 1. Reovirus strain T3A inhibits NF- $\kappa$ B dependent gene expression. (A) ATCC L929  
391 cells were transfected with 0.5  $\mu$ g of vgRNA. 7 h following transfection, total RNA was  
392 extracted and subjected to RNA-seq analyses. A volcano plot showing genes whose  
393 expression is induced > 4-fold ( $\log_2FC > 2$ ) with FDR < 0.05 in comparison to mock  
394 infected cells are shown within the box. (B, C) ATCC L929 cells were transfected with  
395 0.5  $\mu$ g of vgRNA for 7 h or infected with 10 PFU/cell of reovirus strain T3A for 20 h.  
396 Total RNA was extracted and subjected to RNA-seq analyses. (B) A heat map  
397 comparing expression of genes shown in boxed region of Fig. 1A following vgRNA  
398 transfection and T3A infection is shown. (C) A scatterplot comparing expression of  
399 genes shown in boxed region of Fig. 1A following vgRNA transfection and T3A infection  
400 is shown. Black dots denote genes that are not expressed significantly differently in the  
401 two treatments. Red dots represent genes that are expressed to a significantly lower  
402 extent in T3A infected cells. iRegulon analyses of both sets of genes is also shown. (D,  
403 E) ATCC L929 cells were adsorbed with PBS (mock) or 10 PFU/cell of T3A. Following  
404 incubation at 37°C for 20 h, cells were transfected with 0.5  $\mu$ g viral RNA for 7 h. Total  
405 RNA was extracted and subjected to RNA-seq analyses. (D) A heat map comparing  
406 expression of genes shown in boxed region of Fig. 1A following vgRNA transfection of  
407 mock infected and T3A infected cells is shown. (E) A scatterplot comparing expression  
408 of genes shown in boxed region of Fig. 1A following vgRNA transfection of mock  
409 infected and T3A infected cells is shown. Black dots denote genes that are not  
410 expressed significantly differently in the two treatments. Red dots represent genes that

411 are expressed to a significantly lower extent in T3A infected cells transfected with  
412 vgRNA. iRegulon analyses of both sets of genes is also shown.

413 Fig 2. Reovirus strain T3A inhibits TNF $\alpha$  stimulated NF- $\kappa$ B dependent gene expression.  
414 (A) ATCC L929 cells were treated with 10 ng/ml TNF $\alpha$ . 1 h following treatment, total  
415 RNA was extracted and subjected to RNA-seq analyses. A volcano plot showing genes  
416 whose expression is induced > 4-fold ( $\log_2FC > 2$ ) with FDR < 0.05 in comparison to  
417 untreated cells are shown within the box. (B, C, D) ATCC L929 cells were adsorbed with  
418 10 PFU/cell of T3A. Following incubation at 37°C for 20 h, cells were treated with 0 or  
419 10 ng/ml TNF $\alpha$  for 1 h. Total RNA was extracted from cells and was subjected to RNA-  
420 seq analyses. (B) A scatterplot comparing expression of genes shown in boxed region  
421 of Fig. 2A following infection with T3A with or without TNF $\alpha$  is shown. A trendline  
422 showing linear regression and coefficient of determination is shown. (C) A scatterplot  
423 comparing expression of genes shown in boxed region of Fig. 2A following TNF $\alpha$   
424 treatment of mock infected and T3A infected cells is shown. A trendline showing linear  
425 regression and coefficient of determination shown. (D) A heat map comparing  
426 expression of genes shown in boxed region of Fig. 2A following TNF $\alpha$  treatment of  
427 mock infected and T3A infected cells is shown. Expression of the same set of genes in  
428 T3A infected cells is also shown.

429 Fig 3. Reovirus inhibits NF- $\kappa$ B signaling upstream of gene expression. (A) ATCC L929  
430 cells were adsorbed with PBS (mock) or 10 PFU/cell of T3A. Following incubation at  
431 37°C for 20 h, cells were transfected with vgRNA and incubated for 7 h. RNA was  
432 extracted from cells and levels of I $\kappa$ B $\alpha$  mRNA relative to GAPDH control was measured  
433 using RT-qPCR. I $\kappa$ B $\alpha$  expression in mock infected cells treated with agonist vgRNA was

434 set to 100%. Gene expression of each replicate, the mean value, and SD are shown <sup>\*\*\*</sup>,  
435  $P < 0.001$  by Student's t test in comparison to mock infected cells transfected with  
436 vgRNA. (B) ATCC L929 cells were adsorbed with PBS (mock) or 10 PFU/cell of T3A.  
437 Following incubation at 37°C for 20 h, cells were treated with 10 ng/ml TNF $\alpha$  and  
438 incubated for 1 h. RNA was extracted from cells and levels of I $\kappa$ B $\alpha$  mRNA relative to  
439 GAPDH control was measured using RT-qPCR. I $\kappa$ B $\alpha$  expression in mock infected cells  
440 treated with agonist TNF $\alpha$  was set to 100%. Gene expression of each replicate, the  
441 mean value and SD are shown <sup>\*\*</sup>,  $P < 0.01$  by Student's t test in comparison to mock  
442 infected cells transfected with vgRNA. (C) ATCC L929 cells were adsorbed with PBS  
443 (mock) or 10 PFU/cell of T3A. Following incubation at 37°C for 24 h, cells were treated  
444 with 10 ng/ml TNF $\alpha$  and incubated for 1 h. Nuclear extracts were immunoblotted using  
445 antiserum specific for p65 or PSTAIR. (D) ATCC L929 cells were adsorbed with PBS  
446 (mock) or 10 PFU/cell of T3A. Following incubation at 37°C for 24 h, cells were treated  
447 with 20  $\mu$ M proteasome inhibitor PSI for 1 h, then 10 ng/ml TNF $\alpha$  for 30 min. Whole cell  
448 extracts were immunoblotted with antisera specific for p65, p65 Ser536  
449 phosphorylation, and PSTAIR.

450 Fig 4. Reovirus infection causes a decrease in IKK $\beta$  and NEMO levels. ATCC L929  
451 cells were adsorbed with PBS (mock) or 10 PFU/cell of T3A. Following incubation at  
452 37°C for 12 or 24 h, whole cell extracts were immunoblotted with antisera specific to  
453 p50, p65, IKK $\beta$ , NEMO, RIP1, and PSTAIR.

454 Fig 5. Reovirus gene expression is required for loss of IKK $\beta$ . (A) ATCC L929 cells were  
455 adsorbed with PBS (mock) or 10 PFU/cell of T3A in the presence of 0 or 200  $\mu$ M  
456 ribavirin. Following incubation at 37°C for 24 h, whole cell extracts were immunoblotted



457 with antiserum specific for IKK $\beta$ , PSTAIR, and reovirus. (B) ATCC L929 cells were  
458 adsorbed with PBS (mock) or 10 PFU/cell of T3A in the presence of 0 or 200  $\mu$ M  
459 ribavirin. Following incubation at 37°C for 24 h, cells were treated with 10 ng/ml TNF $\alpha$   
460 and incubated for 1 h. Nuclear extracts were immunoblotted using antiserum specific for  
461 p65 or PSTAIR. (C) ATCC L929 cells were adsorbed with PBS (mock) or 10 PFU/cell of  
462 T3A in the presence of 0 or 200  $\mu$ M ribavirin. Following incubation at 37°C for 24 h, cells  
463 were treated with 10 ng/ml TNF $\alpha$  and incubated for 1 h. RNA was extracted from cells  
464 and I $\kappa$ B $\alpha$  gene expression was measured using RT-qPCR. Gene expression in mock  
465 infected cells treated with TNF $\alpha$  was set to 100%. Gene expression of each replicate,  
466 the mean value and SD are shown. \*, P < 0.05 by Student's t test in comparison to  
467 mock infected cells treated with TNF $\alpha$ . NS, not significant in comparison to mock  
468 infected cells treated with TNF $\alpha$ .

469 Fig 6. IKK overexpression overcomes reovirus mediated blockade of NF- $\kappa$ B signaling.

470 (A) HEK293 cells were adsorbed with PBS (mock) or 10 PFU/cell of T3A. Following  
471 incubation at 37°C for 24 h, cells were treated with 10 ng/ml TNF $\alpha$  and incubated for 1  
472 h. RNA was extracted from cells and I $\kappa$ B $\alpha$  gene expression was measured using RT-  
473 qPCR. Gene expression in mock infected cells treated with TNF $\alpha$  was set to 100%.  
474 Gene expression of each replicate, the mean value and SD are shown. \*, P < 0.05 by  
475 Student's t test in comparison to mock infected cells treated with TNF $\alpha$ . (B) HEK293  
476 cells were adsorbed with PBS (mock) or 10 PFU/cell of T3A. Following incubation at  
477 37°C for 24 h, cells were treated with proteasome inhibitor PSI for 1 h, then 10 ng/ml  
478 TNF $\alpha$  for 30 min. Whole cell extracts were immunoblotted using antiserum specific for  
479 IKK $\beta$ , p65 Ser536 phosphorylation, p65, and PSTAIR. (C) HEK293 cells were adsorbed

480 with PBS (mock) or 10 PFU/cell of T3A. Following incubation at 37°C for 24 h, cells  
481 were treated with 10 ng/ml TNF $\alpha$  and incubated for 1 h. Nuclear extracts were  
482 immunoblotted using antiserum specific for p65 or PSTAIR. (D) HEK293 cells were  
483 transfected with vectors expressing Flag-tagged IKK $\beta$  and NEMO. Following incubation  
484 at 37°C for 24 h, HEK293 cells were adsorbed with PBS (mock) or 10 PFU/cell of T3A.  
485 Following an additional incubation at 37°C for 24 h, whole cell extracts were  
486 immunoblotted using antiserum specific for FLAG, p65, p65 Ser536 phosphorylation,  
487 reovirus and PSTAIR.

488 **ACKNOWLEDGEMENTS**

489 We thank members of our laboratory and the Indiana University Virology community for  
490 helpful suggestions. We are also grateful to scientists in the Indiana University Center  
491 for Genomics and Bioinformatics.

492 Research reported in this publication was supported by funds from the National Institute  
493 of Allergy and Infectious Diseases under award number R01AI110637 (to P.D.) and by  
494 funds from the Indiana Clinical and Translational Sciences Institute under award  
495 Number UL1TR002529 from the National Institutes of Health, National Center for  
496 Advancing Translational Sciences, Clinical and Translational Sciences Award. The  
497 content is solely the responsibility of the authors and does not necessarily represent the  
498 official views of the funders.

499

500

## 501 REFERENCES

- 502 1. Mogensen TH, Paludan SR. 2001. Molecular pathways in virus-induced cytokine  
503 production. *Microbiol Mol Biol Rev* 65:131-50.
- 504 2. Wu J, Chen ZJ. 2014. Innate immune sensing and signaling of cytosolic nucleic  
505 acids. *Annu Rev Immunol* 32:461-88.
- 506 3. Kato H, Sato S, Yoneyama M, Yamamoto M, Uematsu S, Matsui K, Tsujimura T,  
507 Takeda K, Fujita T, Takeuchi O, Akira S. 2005. Cell type-specific involvement of  
508 RIG-I in antiviral response. *Immunity* 23:19-28.
- 509 4. Kawai T, Takahashi K, Sato S, Coban C, Kumar H, Kato H, Ishii KJ, Takeuchi O,  
510 Akira S. 2005. IPS-1, an adaptor triggering RIG-I- and Mda5-mediated type I  
511 interferon induction. *Nat Immunol* 6:981-988.
- 512 5. Sato M, Suemori H, Hata N, Asagiri M, Ogasawara K, Nakao K, Nakaya T,  
513 Katsuki M, Noguchi S, Tanaka N, Taniguchi T. 2000. Distinct and essential roles  
514 of transcription factors IRF-3 and IRF-7 in response to viruses for IFN-alpha/beta  
515 gene induction. *Immunity* 13:539-548.
- 516 6. Muller U, Steinhoff U, Reis LF, Hemmi S, Pavlovic J, Zinkernagel RM, Aguet M.  
517 1994. Functional role of type I and type II interferons in antiviral defense. *Science*  
518 264:1918-1921.
- 519 7. Fensterl V, Chattopadhyay S, Sen GC. 2015. No Love Lost Between Viruses and  
520 Interferons. *Annu Rev Virol* 2:549-72.
- 521 8. Garcia-Sastre A. 2017. Ten Strategies of Interferon Evasion by Viruses. *Cell*  
522 *Host Microbe* 22:176-184.
- 523 9. Zhang Q, Lenardo MJ, Baltimore D. 2017. 30 Years of NF-kappaB: A Blossoming  
524 of Relevance to Human Pathobiology. *Cell* 168:37-57.
- 525 10. Chen LF, Williams SA, Mu Y, Nakano H, Duerr JM, Buckbinder L, Greene WC.  
526 2005. NF-kappaB RelA phosphorylation regulates RelA acetylation. *Molecular*  
527 *and cellular biology* 25:7966-75.
- 528 11. Dermody TS, Parker JC, Sherry B. 2013. Orthoreoviruses, p 1304-1346. *In* Knipe  
529 DM, Howley PM (ed), *Fields Virology*, Sixth ed, vol 2. Lippincott Williams &  
530 Wilkins, Philadelphia.
- 531 12. O'Donnell SM, Hansberger MW, Connolly JL, Chappell JD, Watson MJ, Pierce  
532 JM, Wetzel JD, Han W, Barton ES, Forrest JC, Valyi-Nagy T, Yull FE, Blackwell  
533 TS, Rottman JN, Sherry B, Dermody TS. 2005. Organ-specific roles for  
534 transcription factor NF-kappaB in reovirus-induced apoptosis and disease. *J Clin*  
535 *Invest* 115:2341-50.
- 536 13. Berger AK, Hiller BE, Thete D, Snyder AJ, Perez E, Jr., Upton JW, Danthi P.  
537 2017. Viral RNA at Two Stages of Reovirus Infection Is Required for the  
538 Induction of Necroptosis. *J Virol* 91.
- 539 14. O'Donnell SM, Holm GH, Pierce JM, Tian B, Watson MJ, Chari RS, Ballard DW,  
540 Brasier AR, Dermody TS. 2006. Identification of an NF-kappaB-dependent gene  
541 network in cells infected by mammalian reovirus. *J Virol* 80:1077-86.
- 542 15. Goubau D, Schlee M, Deddouche S, Pruijssers AJ, Zillinger T, Goldeck M,  
543 Schuberth C, Van der Veen AG, Fujimura T, Rehwinkel J, Iskarpatyoti JA,  
544 Barchet W, Ludwig J, Dermody TS, Hartmann G, Reis ESC. 2014. Antiviral

- 545 immunity via RIG-I-mediated recognition of RNA bearing 5'-diphosphates. *Nature*  
546 doi:10.1038/nature13590.
- 547 16. Kato H, Takeuchi O, Mikamo-Satoh E, Hirai R, Kawai T, Matsushita K, Hiiragi A,  
548 Dermody TS, Fujita T, Akira S. 2008. Length-dependent recognition of double-  
549 stranded ribonucleic acids by retinoic acid-inducible gene-I and melanoma  
550 differentiation-associated gene 5. *J Exp Med* 205:1601-10.
- 551 17. Stuart JD, Holm GH, Boehme KW. 2018. Differential Delivery of Genomic  
552 Double-Stranded RNA Causes Reovirus Strain-Specific Differences in Interferon  
553 Regulatory Factor 3 Activation. *J Virol* 92.
- 554 18. Janky R, Verfaillie A, Imrichova H, Van de Sande B, Standaert L, Christiaens V,  
555 Hulselmans G, Hertzen K, Naval Sanchez M, Potier D, Svetlichnyy D, Kalender  
556 Atak Z, Fiers M, Marine JC, Aerts S. 2014. iRegulon: from a gene list to a gene  
557 regulatory network using large motif and track collections. *PLoS Comput Biol*  
558 10:e1003731.
- 559 19. Loo YM, Fornek J, Crochet N, Bajwa G, Perwitasari O, Martinez-Sobrido L, Akira  
560 S, Gill MA, Garcia-Sastre A, Katze MG, Gale M, Jr. 2008. Distinct RIG-I and  
561 MDA5 signaling by RNA viruses in innate immunity. *J Virol* 82:335-345.
- 562 20. Baeuerle P, Baltimore D. 1988. I $\kappa$ B: a specific inhibitor of the NF- $\kappa$ B transcription  
563 factor. *Science* 242:540-546.
- 564 21. Clarke P, Meintzer SM, Moffitt LA, Tyler KL. 2003. Two distinct phases of virus-  
565 induced nuclear factor kappa B regulation enhance tumor necrosis factor-related  
566 apoptosis-inducing ligand-mediated apoptosis in virus-infected cells. *Journal of*  
567 *Biological Chemistry* 278:18092-18100.
- 568 22. Rankin UT, Jr., Eppes SB, Antczak JB, Joklik WK. 1989. Studies on the  
569 mechanism of the antiviral activity of ribavirin against reovirus. *Virology* 168:147-  
570 158.
- 571 23. Connolly JL, Rodgers SE, Clarke P, Ballard DW, Kerr LD, Tyler KL, Dermody TS.  
572 2000. Reovirus-induced apoptosis requires activation of transcription factor NF-  
573 kappaB. *J Virol* 74:2981-9.
- 574 24. Hansberger MW, Campbell JA, Danthi P, Arrate P, Pennington KN, Marcu KB,  
575 Ballard DW, Dermody TS. 2007. I $\kappa$ B kinase subunits alpha and gamma are  
576 required for activation of NF- $\kappa$ B and induction of apoptosis by mammalian  
577 reovirus. *J Virol* 81:1360-71.
- 578 25. Stebbing RE, Irvin SC, Rivera-Serrano EE, Boehme KW, Ikizler M, Yoder JA,  
579 Dermody TS, Sherry B. 2014. An ITAM in a nonenveloped virus regulates  
580 activation of NF- $\kappa$ B, induction of beta interferon, and viral spread. *J Virol*  
581 88:2572-83.
- 582 26. Danthi P, Coffey CM, Parker JS, Abel TW, Dermody TS. 2008. Independent  
583 regulation of reovirus membrane penetration and apoptosis by the mu1 phi  
584 domain. *PLoS Pathog* 4:e1000248.
- 585 27. Danthi P, Kobayashi T, Holm GH, Hansberger MW, Abel TW, Dermody TS.  
586 2008. Reovirus apoptosis and virulence are regulated by host cell membrane  
587 penetration efficiency. *J Virol* 82:161-72.
- 588 28. Clarke P, Debiasi RL, Meintzer SM, Robinson BA, Tyler KL. 2005. Inhibition of  
589 NF- $\kappa$ B activity and cFLIP expression contribute to viral-induced apoptosis.  
590 *Apoptosis* 10:513-524.

- 591 29. Hiller BE, Berger AK, Danthi P. 2015. Viral gene expression potentiates reovirus-  
592 induced necrosis. *Virology* doi:10.1016/j.virol.2015.06.018.
- 593 30. Poppe M, Wittig S, Jurida L, Bartkuhn M, Wilhelm J, Muller H, Beuerlein K, Karl  
594 N, Bhujra S, Ziebuhr J, Schmitz ML, Kracht M. 2017. The NF-kappaB-dependent  
595 and -independent transcriptome and chromatin landscapes of human coronavirus  
596 229E-infected cells. *PLoS Pathog* 13:e1006286.
- 597 31. Fliss PM, Jowers TP, Brinkmann MM, Holstermann B, Mack C, Dickinson P,  
598 Hohenberg H, Ghazal P, Brune W. 2012. Viral mediated redirection of  
599 NEMO/IKKgamma to autophagosomes curtails the inflammatory cascade. *PLoS*  
600 *Pathog* 8:e1002517.
- 601 32. Ashida H, Kim M, Schmidt-Supprian M, Ma A, Ogawa M, Sasakawa C. 2010. A  
602 bacterial E3 ubiquitin ligase IpaH9.8 targets NEMO/IKKgamma to dampen the  
603 host NF-kappaB-mediated inflammatory response. *Nat Cell Biol* 12:66-73; sup pp  
604 1-9.
- 605 33. Li Q, Zheng Z, Liu Y, Zhang Z, Liu Q, Meng J, Ke X, Hu Q, Wang H. 2016. 2C  
606 Proteins of Enteroviruses Suppress IKKbeta Phosphorylation by Recruiting  
607 Protein Phosphatase 1. *J Virol* 90:5141-5151.
- 608 34. Gao S, Song L, Li J, Zhang Z, Peng H, Jiang W, Wang Q, Kang T, Chen S,  
609 Huang W. 2012. Influenza A virus-encoded NS1 virulence factor protein inhibits  
610 innate immune response by targeting IKK. *Cell Microbiol* 14:1849-66.
- 611 35. Goodwin CM, Schafer X, Munger J. 2019. UL26 attenuates IKKbeta-mediated  
612 induction of ISG expression and enhanced protein ISGylation during HCMV  
613 infection. *J Virol* doi:10.1128/JVI.01052-19.
- 614 36. Xing J, Weng L, Yuan B, Wang Z, Jia L, Jin R, Lu H, Li XC, Liu YJ, Zhang Z.  
615 2016. Identification of a role for TRIM29 in the control of innate immunity in the  
616 respiratory tract. *Nat Immunol* 17:1373-1380.
- 617 37. Basagoudanavar SH, Thapa RJ, Nogusa S, Wang J, Beg AA, Balachandran S.  
618 2011. Distinct roles for the NF-kappa B RelA subunit during antiviral innate  
619 immune responses. *J Virol* 85:2599-610.
- 620 38. Wang J, Basagoudanavar SH, Wang X, Hopewell E, Albrecht R, Garcia-Sastre  
621 A, Balachandran S, Beg AA. 2010. NF-kappa B RelA subunit is crucial for early  
622 IFN-beta expression and resistance to RNA virus replication. *J Immunol*  
623 185:1720-9.
- 624 39. Stanifer ML, Kischnick C, Rippert A, Albrecht D, Boulant S. 2017. Reovirus  
625 inhibits interferon production by sequestering IRF3 into viral factories. *Sci Rep*  
626 7:10873.
- 627 40. Zurney J, Kobayashi T, Holm GH, Dermody TS, Sherry B. 2009. Reovirus mu2  
628 protein inhibits interferon signaling through a novel mechanism involving nuclear  
629 accumulation of interferon regulatory factor 9. *J Virol* 83:2178-87.
- 630 41. Berard A, Coombs KM. 2009. Mammalian reoviruses: propagation, quantification,  
631 and storage. *Curr Protoc Microbiol* Chapter 15:Unit15C 1.
- 632 42. Wetzel JD, Chappell JD, Fogo AB, Dermody TS. 1997. Efficiency of viral entry  
633 determines the capacity of murine erythroleukemia cells to support persistent  
634 infections by mammalian reoviruses. *J Virol* 71:299-306.
- 635 43. Bolger AM, Lohse M, Usadel B. 2014. Trimmomatic: a flexible trimmer for  
636 Illumina sequence data. *Bioinformatics* 30:2114-20.

- 637 44. Dobin A, Davis CA, Schlesinger F, Drenkow J, Zaleski C, Jha S, Batut P,  
638 Chaisson M, Gingeras TR. 2013. STAR: ultrafast universal RNA-seq aligner.  
639 Bioinformatics 29:15-21.
- 640 45. Liao Y, Smyth GK, Shi W. 2014. featureCounts: an efficient general purpose  
641 program for assigning sequence reads to genomic features. Bioinformatics  
642 30:923-30.
- 643 46. Love MI, Huber W, Anders S. 2014. Moderated estimation of fold change and  
644 dispersion for RNA-seq data with DESeq2. Genome Biol 15:550.
- 645 47. Schmittgen TD, Livak KJ. 2008. Analyzing real-time PCR data by the  
646 comparative C(T) method. Nat Protoc 3:1101-8.
- 647

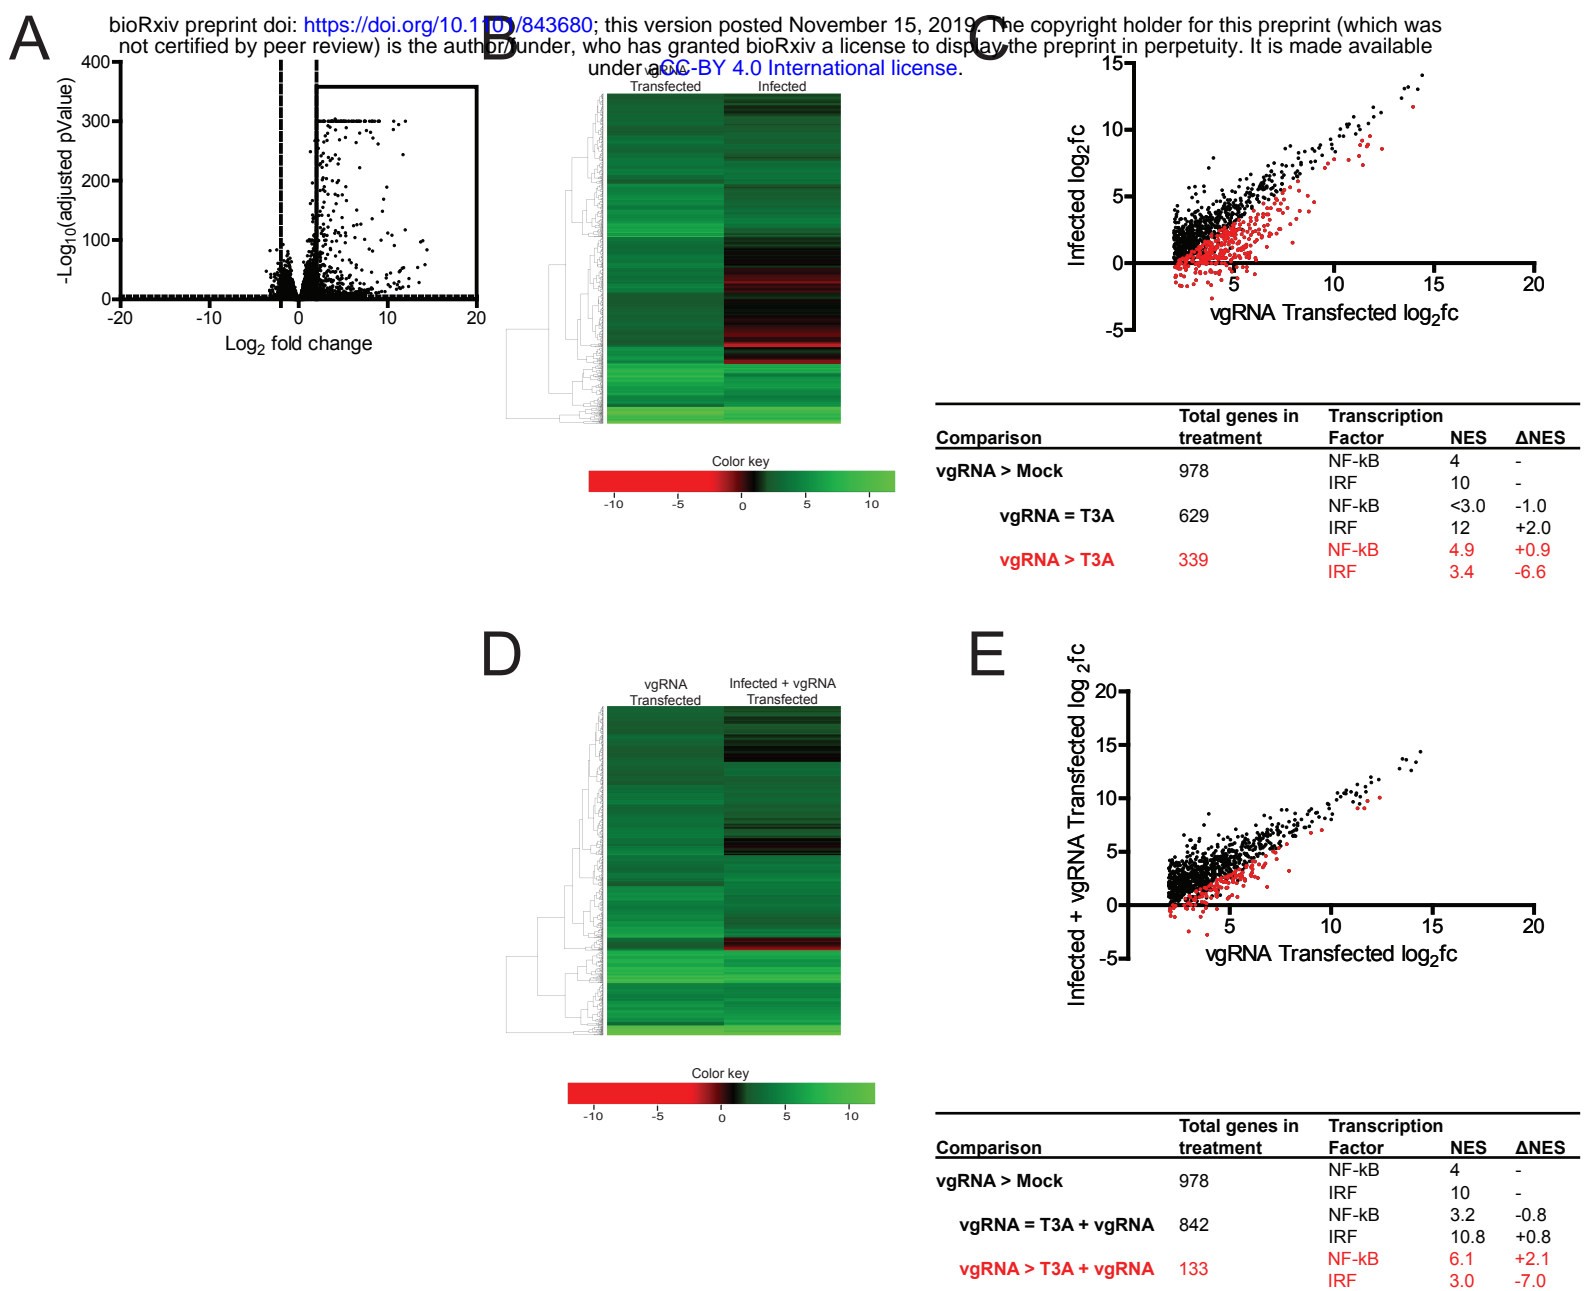

Fig 1. Reovirus strain T3A inhibits NF- $\kappa$ B dependent gene expression. (A) ATCC L929 cells were transfected with 0.5  $\mu$ g of vgRNA. 7 h following transfection, total RNA was extracted and subjected to RNA-seq analyses. A volcano plot showing genes whose expression is induced > 4-fold ( $\log_2FC > 2$ ) with FDR < 0.05 in comparison to mock infected cells are shown within the box. (B, C) ATCC L929 cells were transfected with 0.5  $\mu$ g of vgRNA for 7 h or infected with 10 PFU/cell of reovirus strain T3A for 20 h. Total RNA was extracted and subjected to RNA-seq analyses. (B) A heat map comparing expression of genes shown in boxed region of Fig. 1A following vgRNA transfection and T3A infection is shown. (C) A scatterplot comparing expression of genes shown in boxed region of Fig. 1A following vgRNA transfection and T3A infection is shown. Black dots denote genes that are not expressed significantly differently in the two treatments. Red dots represent genes that are expressed to a significantly lower extent in T3A infected cells. iRegulon analyses of both sets of genes is also shown. (D, E) ATCC L929 cells were adsorbed with PBS (mock) or 10 PFU/cell of T3A. Following incubation at 37°C for 20 h, cells were transfected with 0.5  $\mu$ g viral RNA for 7 h. Total RNA was extracted and subjected to RNA-seq analyses. (D) A heat map comparing expression of genes shown in boxed region of Fig. 1A following vgRNA transfection of mock infected and T3A infected cells is shown. (E) A scatterplot comparing expression of genes shown in boxed region of Fig. 1A following vgRNA transfection of mock infected and T3A infected cells is shown. Black dots denote genes that are not expressed significantly differently in the two treatments. Red dots represent genes that are expressed to a significantly lower extent in T3A infected cells transfected with vgRNA. iRegulon analyses of both sets of genes is also shown.



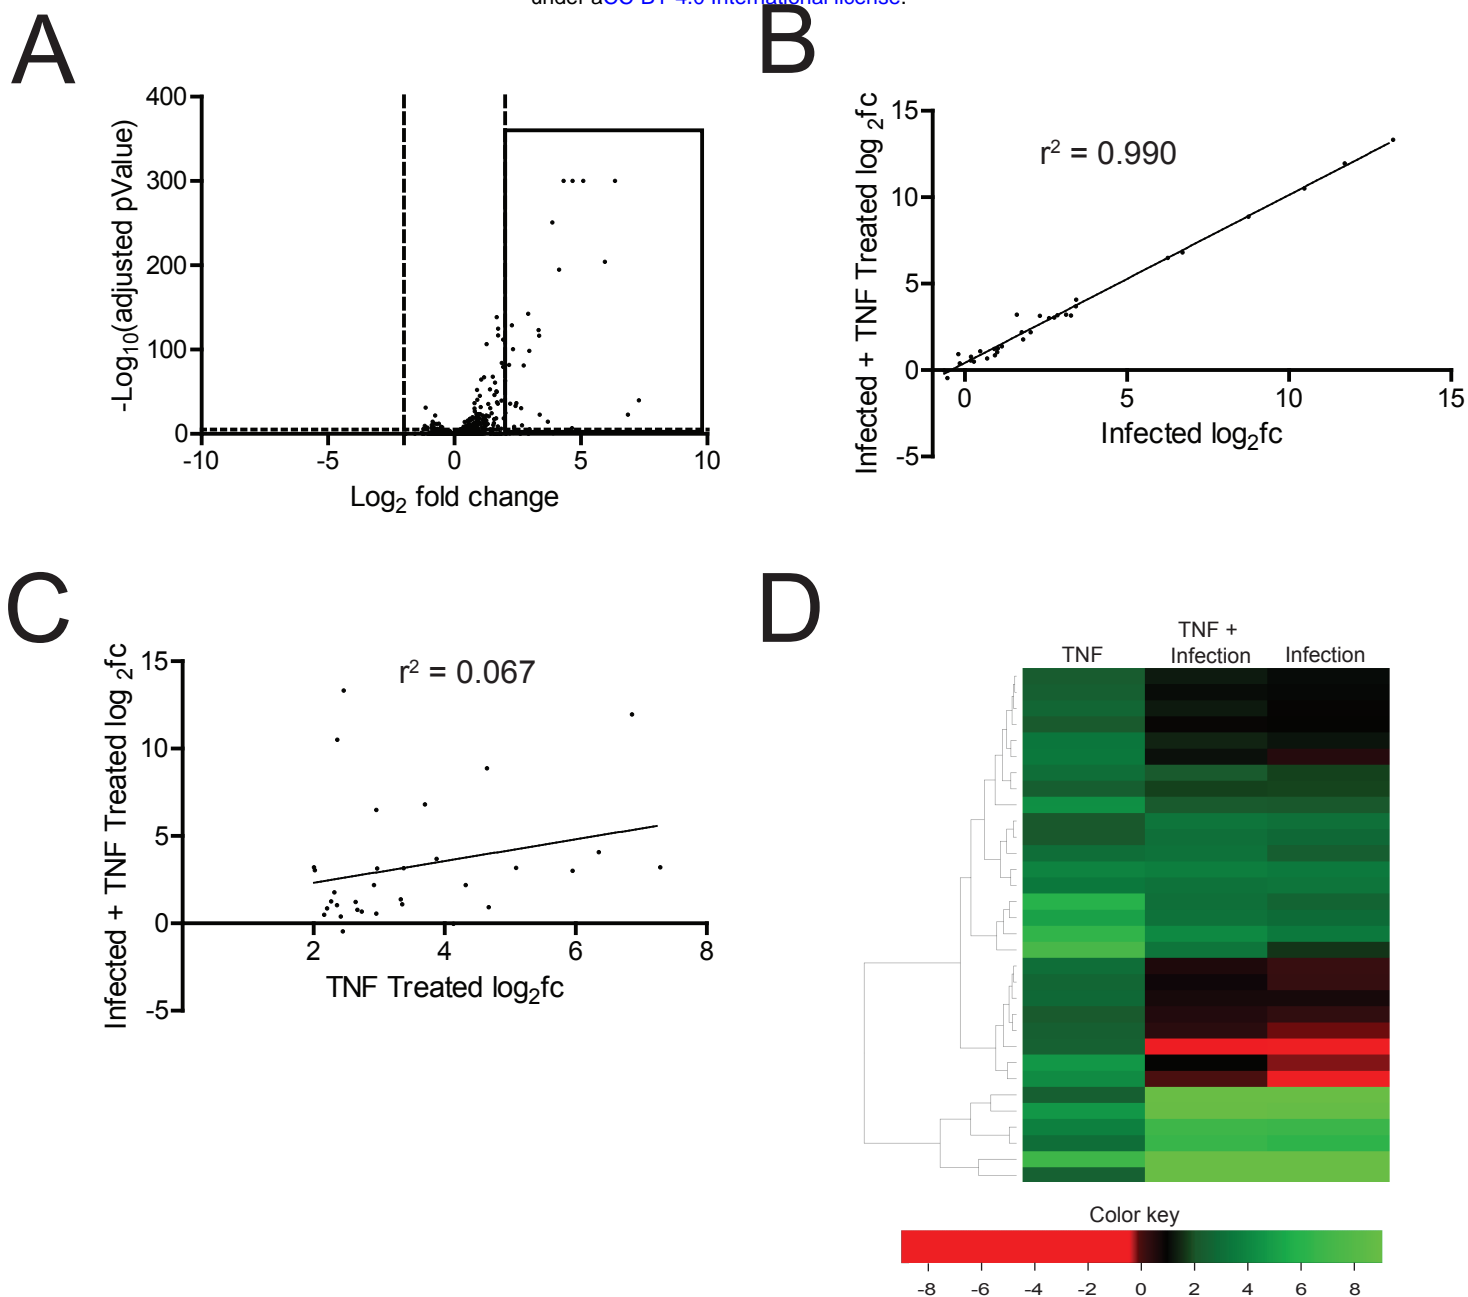

Fig 2. Reovirus strain T3A inhibits TNF $\alpha$  stimulated NF- $\kappa$ B dependent gene expression. (A) ATCC L929 cells were treated with 10 ng/ml TNF $\alpha$ . 1 h following treatment, total RNA was extracted and subjected to RNA-seq analyses. A volcano plot showing genes whose expression is induced > 4-fold ( $\log_2FC > 2$ ) with FDR < 0.05 in comparison to untreated cells are shown within the box. (B, C, D) ATCC L929 cells were adsorbed with 10 PFU/cell of T3A. Following incubation at 37°C for 20 h, cells were treated with 0 or 10 ng/ml TNF $\alpha$  for 1 h. Total RNA was extracted from cells and was subjected to RNA-seq analyses. (B) A scatterplot comparing expression of genes shown in boxed region of Fig. 2A following infection with T3A with or without TNF $\alpha$  is shown. A trendline showing linear regression and coefficient of determination is shown. (C) A scatterplot comparing expression of genes shown in boxed region of Fig. 2A following TNF $\alpha$  treatment of mock infected and T3A infected cells is shown. A trendline showing linear regression and coefficient of determination shown. (D) A heat map comparing expression of genes shown in boxed region of Fig. 2A following TNF $\alpha$  treatment of mock infected and T3A infected cells is shown. Expression of the same set of genes in T3A infected cells is also shown.

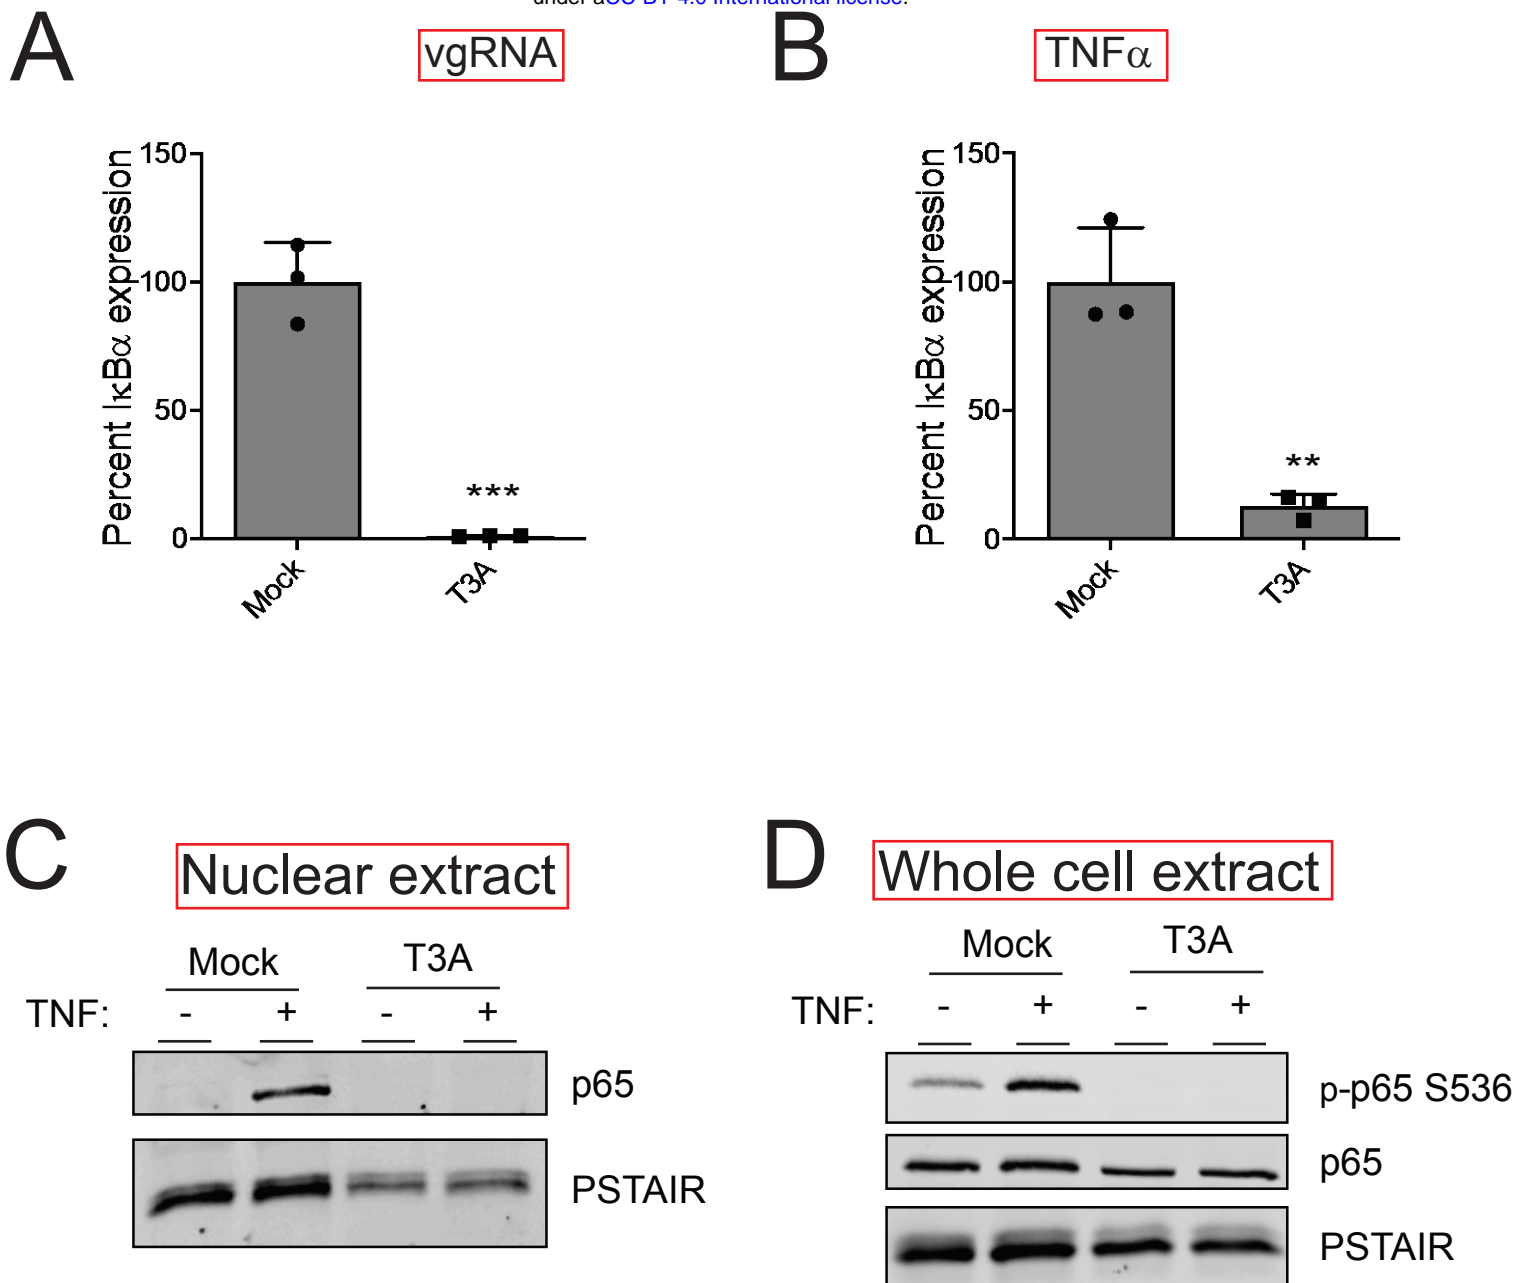

Fig 3. Reovirus inhibits NF- $\kappa$ B signaling upstream of gene expression. (A) ATCC L929 cells were adsorbed with PBS (mock) or 10 PFU/cell of T3A. Following incubation at 37°C for 20 h, cells were transfected with vgRNA and incubated for 7 h. RNA was extracted from cells and levels of I $\kappa$ B $\alpha$  mRNA relative to GAPDH control was measured using RT-qPCR. I $\kappa$ B $\alpha$  expression in mock infected cells treated with agonist vgRNA was set to 100%. Gene expression of each replicate, the mean value, and SD are shown \*\*\*, P < 0.001 by Student's t test in comparison to mock infected cells transfected with vgRNA. (B) ATCC L929 cells were adsorbed with PBS (mock) or 10 PFU/cell of T3A. Following incubation at 37°C for 20 h, cells were treated with 10 ng/ml TNF $\alpha$  and incubated for 1 h. RNA was extracted from cells and levels of I $\kappa$ B $\alpha$  mRNA relative to GAPDH control was measured using RT-qPCR. I $\kappa$ B $\alpha$  expression in mock infected cells treated with agonist TNF $\alpha$  was set to 100%. Gene expression of each replicate, the mean value and SD are shown \*\*, P < 0.01 by Student's t test in comparison to mock infected cells treated with vgRNA. (C) ATCC L929 cells were adsorbed with PBS (mock) or 10 PFU/cell of T3A. Following incubation at 37°C for 24 h, cells were treated with 10 ng/ml TNF $\alpha$  and incubated for 1 h. Nuclear extracts were immunoblotted using antiserum specific for p65 or PSTAIR. (D) ATCC L929 cells were adsorbed with PBS (mock) or 10 PFU/cell of T3A. Following incubation at 37°C for 24 h, cells were treated with 20  $\mu$ M proteasome inhibitor PSI for 1 h, then 10 ng/ml TNF $\alpha$  for 30 min. Whole cell extracts were immunoblotted with antisera specific for p65, p65 Ser536 phosphorylation, and PSTAIR.

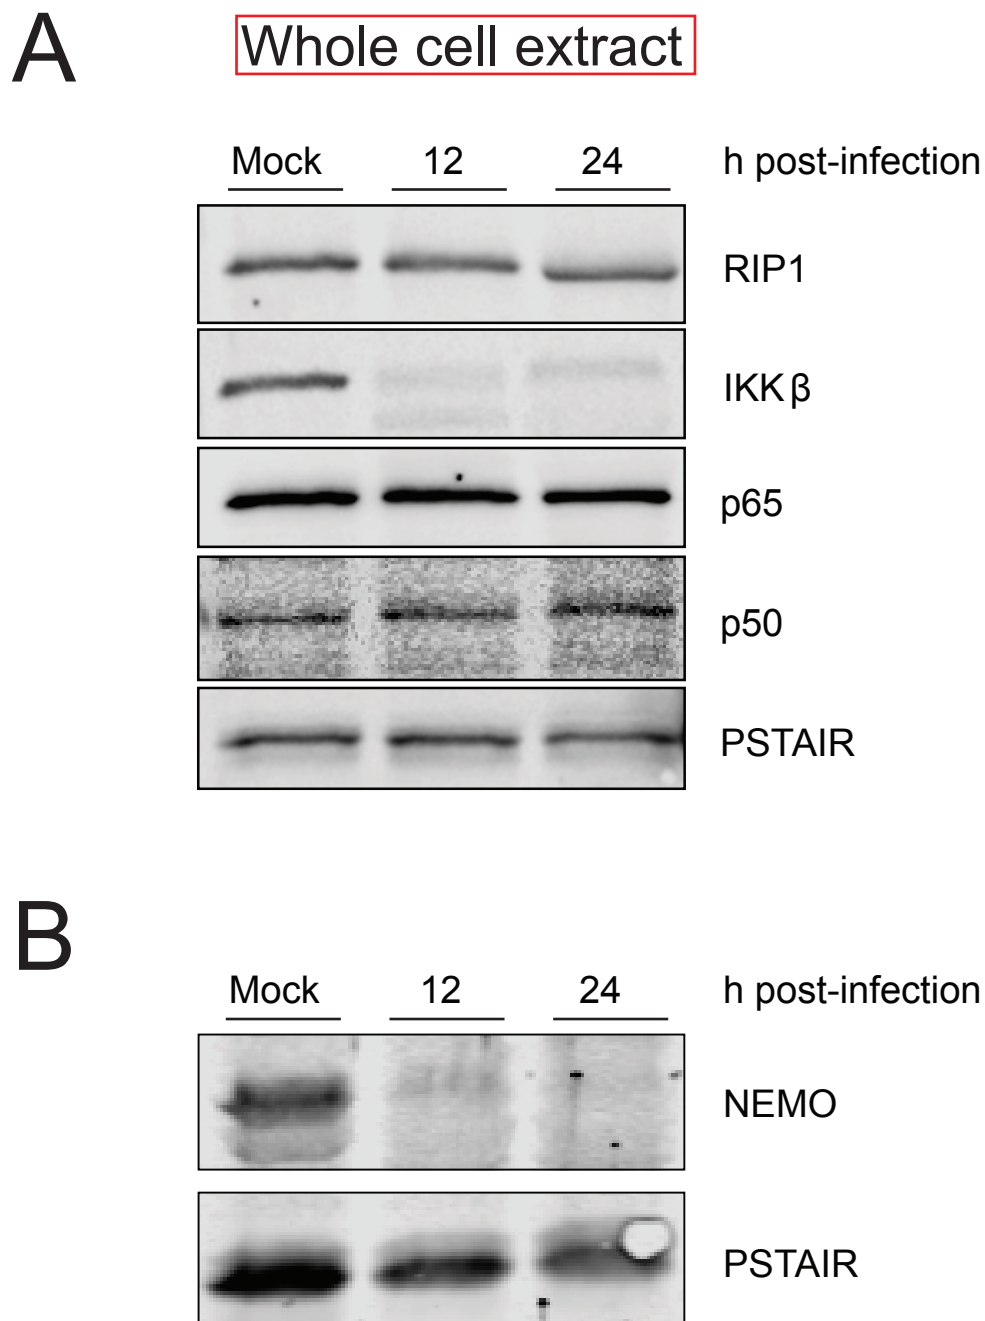

Fig 4. Reovirus infection causes a decrease in IKK $\beta$  and NEMO levels. ATCC L929 cells were adsorbed with PBS (mock) or 10 PFU/cell of T3A. Following incubation at 37°C for 12 or 24 h, whole cell extracts were immunoblotted with antisera specific to p50, p65, IKK $\beta$ , NEMO, RIP1, and PSTAIR.

### A Whole cell extract

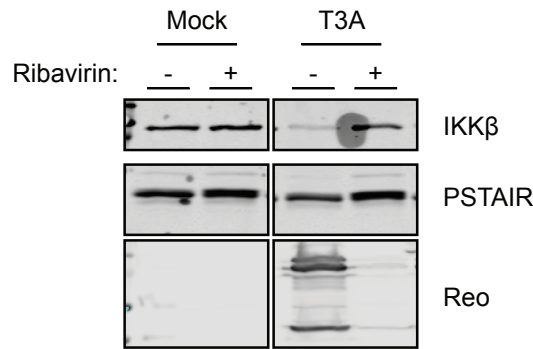

### B Nuclear extract

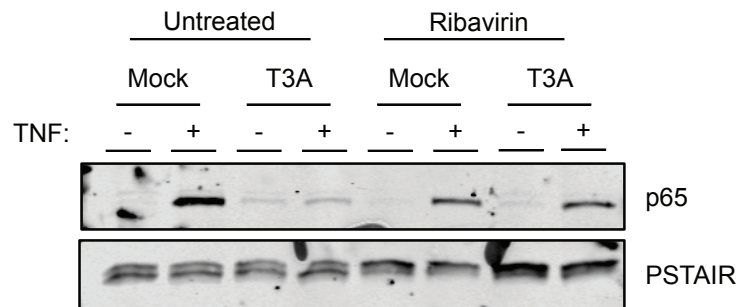

### C TNFα

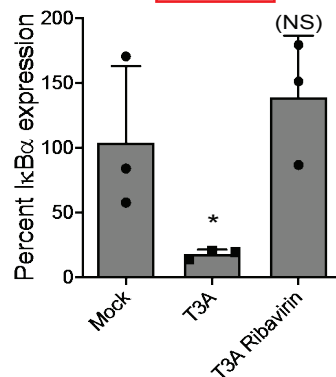

Fig 5. Reovirus gene expression is required for loss of IKK $\beta$ . (A) ATCC L929 cells were adsorbed with PBS (mock) or 10 PFU/cell of T3A in the presence of 0 or 200  $\mu\text{M}$  ribavirin. Following incubation at 37°C for 24 h, whole cell extracts were immunoblotted with antiserum specific for IKK $\beta$ , PSTAIR, and reovirus. (B) ATCC L929 cells were adsorbed with PBS (mock) or 10 PFU/cell of T3A in the presence of 0 or 200  $\mu\text{M}$  ribavirin. Following incubation at 37°C for 24 h, cells were treated with 10 ng/ml TNF $\alpha$  and incubated for 1 h. Nuclear extracts were immunoblotted using antiserum specific for p65 or PSTAIR. (C) ATCC L929 cells were adsorbed with PBS (mock) or 10 PFU/cell of T3A in the presence of 0 or 200  $\mu\text{M}$  ribavirin. Following incubation at 37°C for 24 h, cells were treated with 10 ng/ml TNF $\alpha$  and incubated for 1 h. RNA was extracted from cells and  $\text{IkB}\alpha$  gene expression was measured using RT-qPCR. Gene expression in mock infected cells treated with TNF $\alpha$  was set to 100%. Gene expression of each replicate, the mean value and SD are shown. \*,  $P < 0.05$  by Student's t test in comparison to mock infected cells treated with TNF $\alpha$ . NS, not significant in comparison to mock infected cells treated with TNF $\alpha$ .

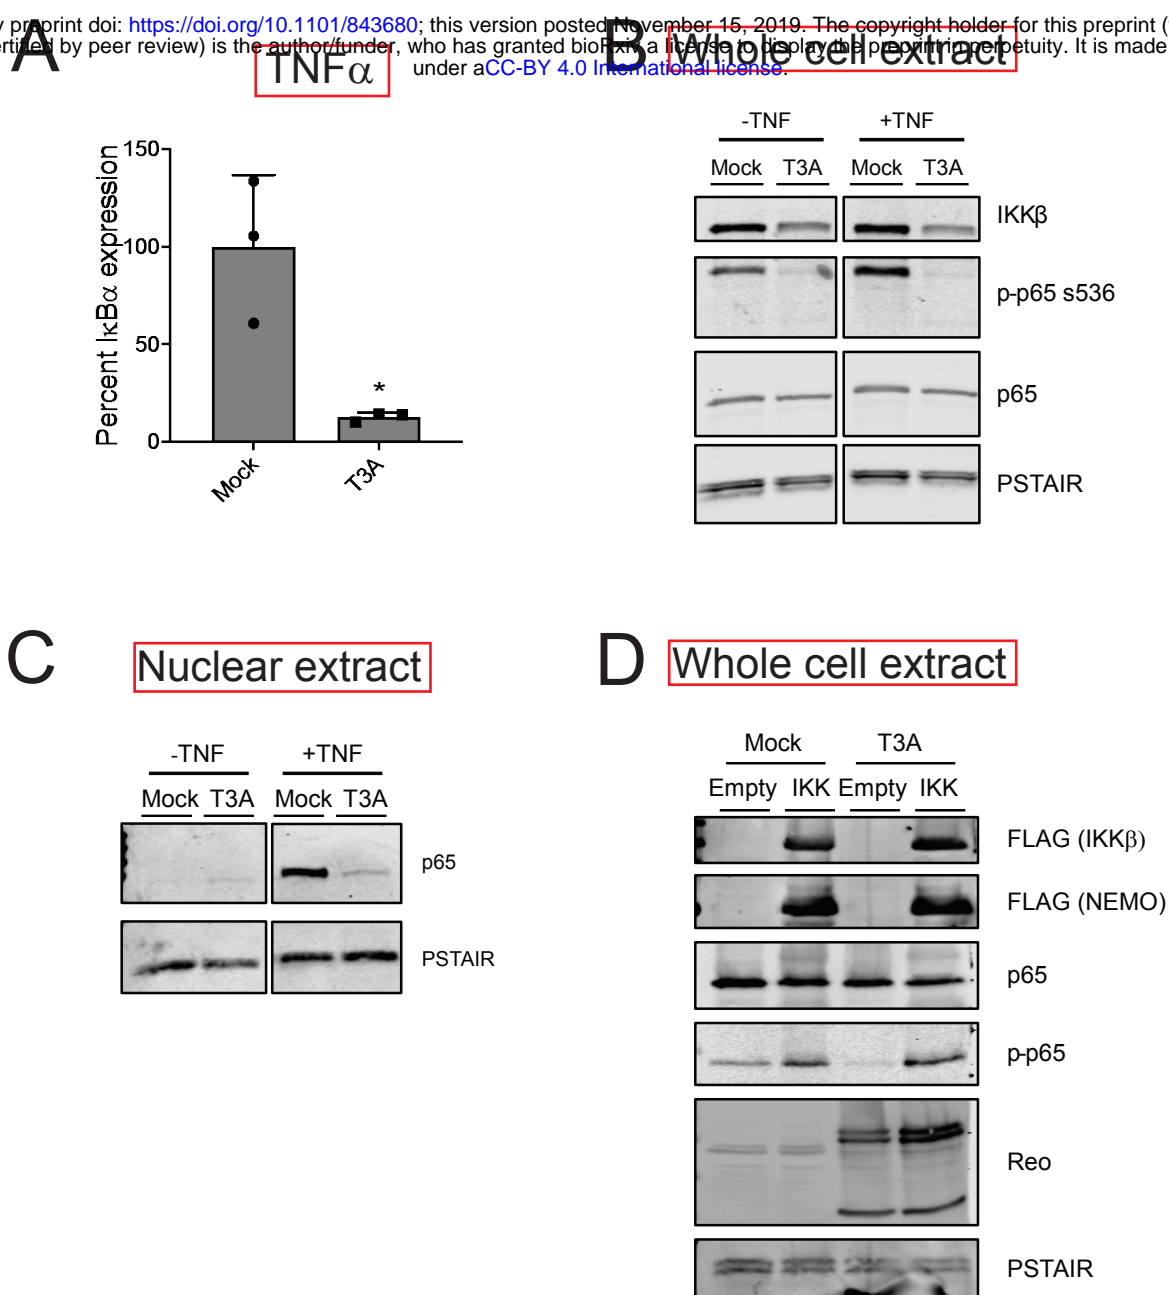

Fig 6. IKK overexpression overcomes reovirus mediated blockade of NF- $\kappa$ B signaling. (A) HEK293 cells were adsorbed with PBS (mock) or 10 PFU/cell of T3A. Following incubation at 37°C for 24 h, cells were treated with 10 ng/ml TNF $\alpha$  and incubated for 1 h. RNA was extracted from cells and IkB $\alpha$  gene expression was measured using RT-qPCR. Gene expression in mock infected cells treated with TNF $\alpha$  was set to 100%. Gene expression of each replicate, the mean value and SD are shown. \*, P < 0.05 by Student's t test in comparison to mock infected cells treated with TNF $\alpha$ . (B) HEK293 cells were adsorbed with PBS (mock) or 10 PFU/cell of T3A. Following incubation at 37°C for 24 h, cells were treated with proteasome inhibitor PSI for 1 h, then 10 ng/ml TNF $\alpha$  for 30 min. Whole cell extracts were immunoblotted using antiserum specific for IKK $\beta$ , p65 Ser536 phosphorylation, p65, and PSTAIR. (C) HEK293 cells were adsorbed with PBS (mock) or 10 PFU/cell of T3A. Following incubation at 37°C for 24 h, cells were treated with 10 ng/ml TNF $\alpha$  and incubated for 1 h. Nuclear extracts were immunoblotted using antiserum specific for p65 or PSTAIR. (D) HEK293 cells were transfected with vectors expressing Flag-tagged IKK $\beta$  and NEMO. Following incubation at 37°C for 24 h, HEK293 cells were adsorbed with PBS (mock) or 10 PFU/cell of T3A. Following an additional incubation at 37°C for 24 h, whole cell extracts were immunoblotted using antiserum specific for FLAG, p65, p65 Ser536 phosphorylation, reovirus and PSTAIR.
